# Supplementary material for: Hysteresis-free and highly stable perovskite solar cells produced via a chlorine-mediated interdiffusion method
Source: Royal Society of Chemistry journal article supplement (doi:10.1039/c5ta01668a), 2015-01-01
Supplement: c5ta01668a1.pdf [file c5ta01668a1.pdf]

# Supporting Information

## Hysteresis-free and highly stable perovskite solar cells produced via a chlorine-mediated interdiffusion method

Neeti Tripathi,<sup>a</sup> Masatoshi Yanagida,<sup>ab</sup> Yasuhiro Shirai,<sup>\*ab</sup> Takuya Masuda,<sup>a</sup> Liyuan Han,<sup>b</sup> and Kenjiro Miyano<sup>a</sup>

<sup>a</sup> Global Research Center for Environment and Energy based on Nanomaterials Science (GREEN), National Institute for Materials Science (NIMS), 1-1 Namiki, Tsukuba, Ibaraki 305-0044, Japan.

\*E-mail: [shirai.yasuhiro@nims.go.jp](mailto:shirai.yasuhiro@nims.go.jp)

<sup>b</sup> Photovoltaic Materials Unit, National Institute for Materials Science (NIMS), 1-2-1 Sengen, Tsukuba, Ibaraki 305-0047, Japan

**Table S1:** Weight percentages of Cl, I, and Pb, estimated from EDX analysis.

| Elements | MAPbI3<br>(No MACl) | MAPbI <sub>3-x</sub> Cl <sub>x</sub><br>(10 wt% MACl) | MAPbI <sub>3-x</sub> Cl <sub>x</sub><br>(20 wt% MACl) | MAPbI <sub>3-x</sub> Cl <sub>x</sub><br>(30 wt% MACl) |
|----------|---------------------|-------------------------------------------------------|-------------------------------------------------------|-------------------------------------------------------|
| Cl       | -0.30               | 0.83                                                  | 1.26                                                  | 1.54                                                  |
| I        | 67.70               | 58.74                                                 | 63.97                                                 | 57.04                                                 |
| Pb       | 32.68               | 40.43                                                 | 34.77                                                 | 41.43                                                 |

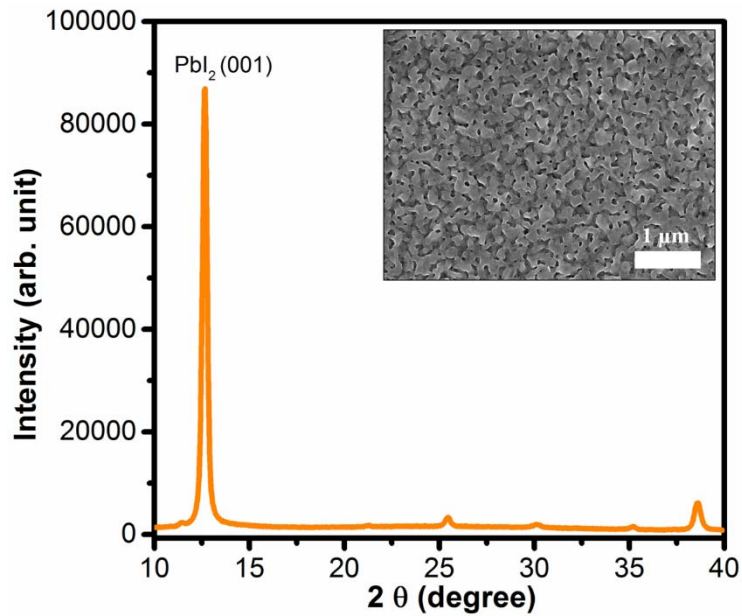

**Figure S1:** XRD patterns of  $\text{PbI}_2$  annealed at  $70^\circ\text{C}$  for 30 min. (inset shows the corresponding SEM image)

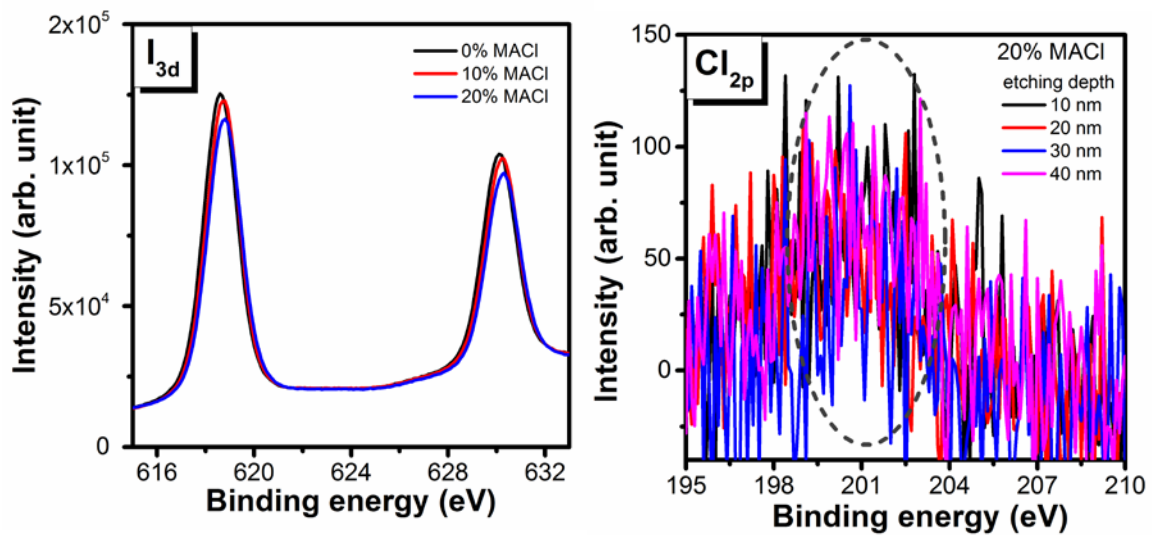

**Figure S2:** XPS spectra of (a)  $\text{I}_{3d}$  core levels with different MACl concentration (b)  $\text{Cl}_{2p}$  core level spectra of 20% MACl doped perovskite film at different penetration depths.

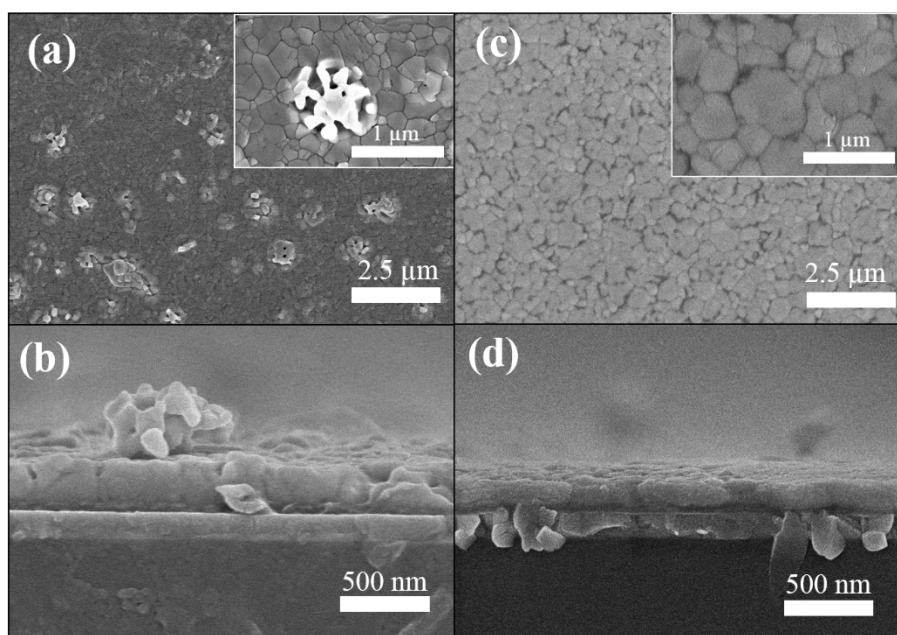

**Figure S3:** SEM images of  $\text{MAPbI}_3$  and  $\text{MAPbI}_{3-x}\text{Cl}_x$  perovskite films before annealing: (a)-(b) top and cross-sectional view of  $\text{MAPbI}_3$ , respectively (c)-(d) top and cross-sectional view of  $\text{MAPbI}_{3-x}\text{Cl}_x$ , respectively.

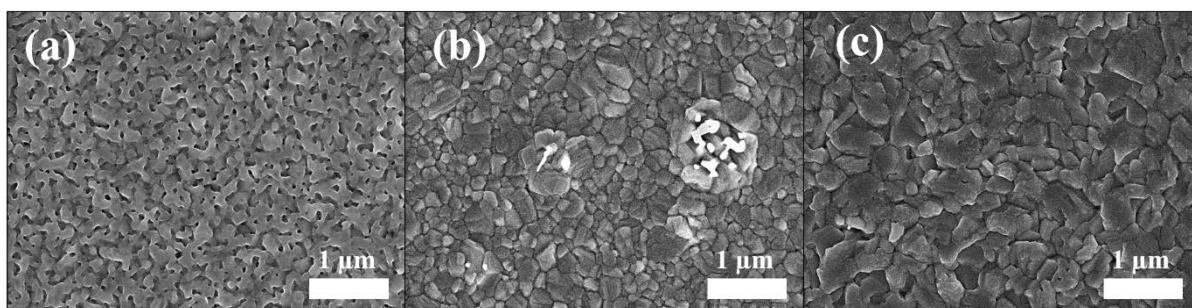

**Figure S4:** Comparison of SEM images (a)  $\text{PbI}_2$ , annealed at  $70^\circ\text{C}$  for 30 min (b)  $\text{PbI}_2/\text{CH}_3\text{NH}_3\text{PbI}_3$  annealed at  $100^\circ\text{C}$  for 2 h. (c)  $\text{PbI}_2/\text{CH}_3\text{NH}_3\text{PbI}_{3-x}\text{Cl}_x$  annealed at  $100^\circ\text{C}$  for 2 h.

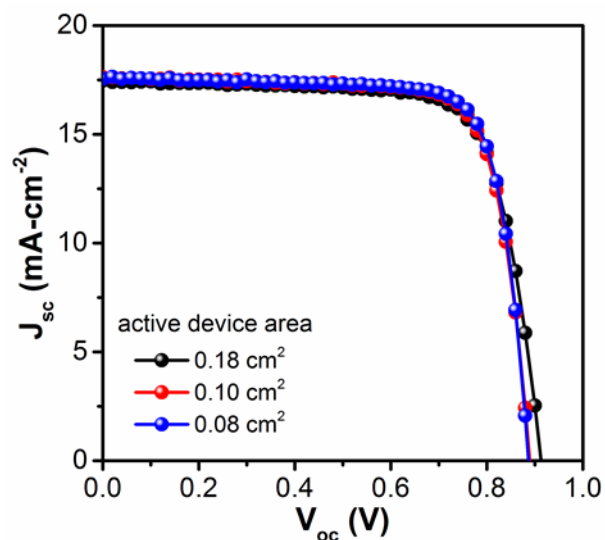

**Figure S5:** The device performance dependences on the aperture size

**Table S2:** The device performance as function of the aperture size.

| <i>Device area</i>   | <i>J<sub>sc</sub> (mA-cm<sup>-2</sup>)</i> | <i>V<sub>oc</sub> (V)</i> | <i>FF</i> | <i>PCE (%)</i> |
|----------------------|--------------------------------------------|---------------------------|-----------|----------------|
| 0.18 cm <sup>2</sup> | 17.49                                      | 0.90                      | 0.75      | 11.98          |
| 0.10 cm <sup>2</sup> | 17.64                                      | 0.88                      | 0.78      | 12.17          |
| 0.08 cm <sup>2</sup> | 17.59                                      | 0.87                      | 0.79      | 12.25          |

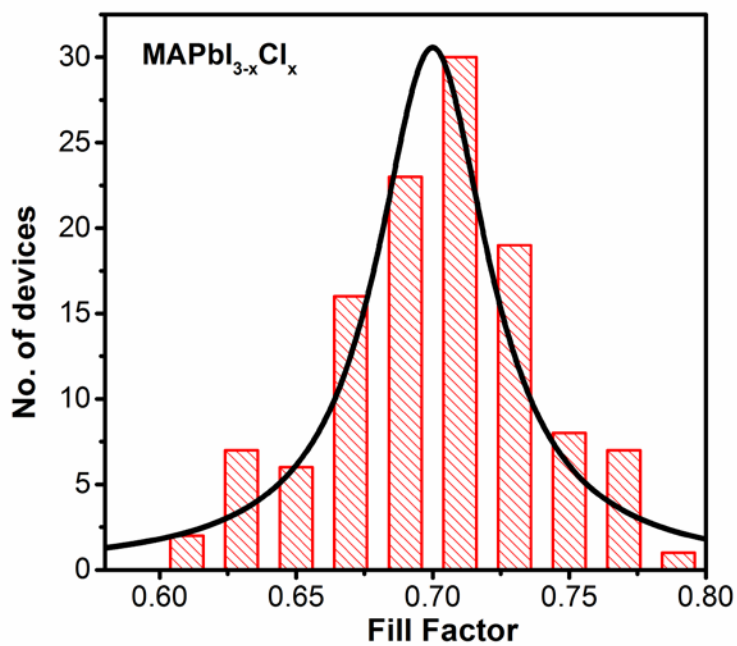

**Figure S6:** Fill Factor distribution of 120 MAPbI<sub>3-x</sub>Cl<sub>x</sub> devcies with device area 0.18 cm<sup>2</sup>.

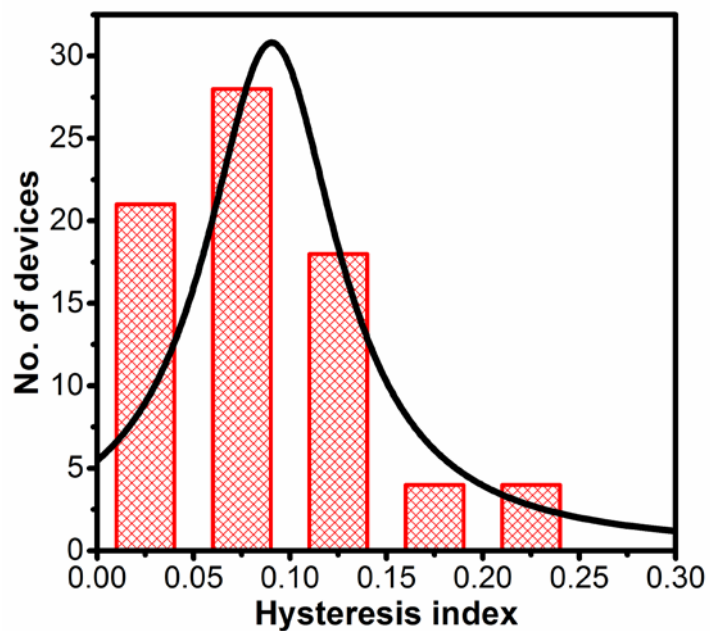

**Figure S7:** Hysteresis index distribution of 80 MAPbI<sub>3-x</sub>Cl<sub>x</sub> devices with device area 0.18 cm<sup>2</sup>.

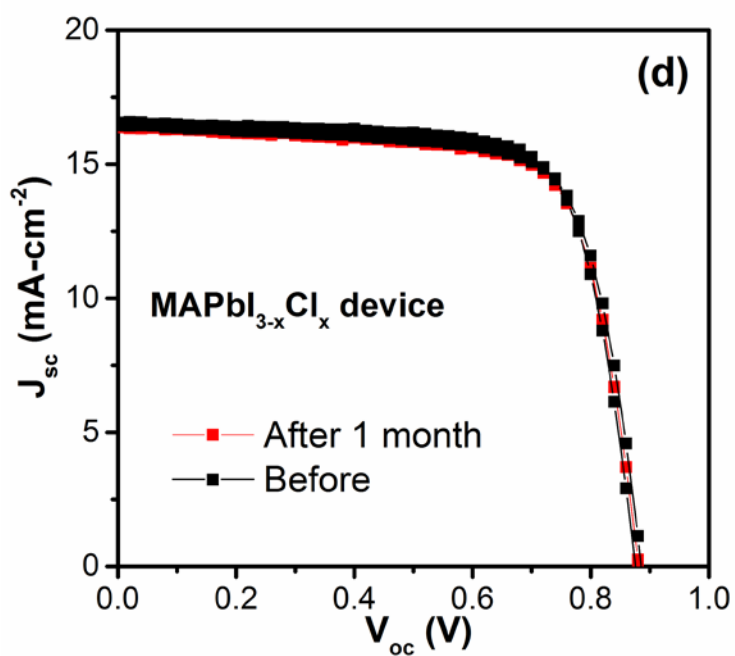

**Figure S8:** J-V curve of MAPbI<sub>3-x</sub>Cl<sub>x</sub> device before and after 1 month.

Spectral match for c-Si:

| StartWL | EndWL   | Sample Integr. | Sample% | Solar Integr. | Solar% | Coincidence | Judgement |
|---------|---------|----------------|---------|---------------|--------|-------------|-----------|
| 400.00  | 500.00  | 141.31         | 19.36   | 138.71        | 18.46  | 1.05        | A         |
| 500.00  | 600.00  | 148.81         | 20.39   | 151.28        | 20.13  | 1.01        | A         |
| 600.00  | 700.00  | 130.71         | 17.91   | 137.47        | 18.30  | 0.98        | A         |
| 700.00  | 800.00  | 97.77          | 13.39   | 111.49        | 14.84  | 0.90        | A         |
| 800.00  | 900.00  | 84.43          | 11.57   | 92.04         | 12.25  | 0.94        | A         |
| 900.00  | 1100.00 | 126.92         | 17.39   | 120.34        | 16.02  | 1.09        | A         |
| Sum     |         | 729.95         | 100.00  | 751.33        | 100.00 | 0.97        |           |

Spectral match for a-Si:

| StartWL | EndWL  | Sample Integr. | Sample% | Solar Integr. | Solar% | Coincidence | Judgement |
|---------|--------|----------------|---------|---------------|--------|-------------|-----------|
| 350.00  | 400.00 | 31.49          | 6.19    | 33.68         | 6.49   | 0.95        | A         |
| 400.00  | 450.00 | 54.70          | 10.75   | 59.86         | 11.53  | 0.93        | A         |
| 450.00  | 500.00 | 86.61          | 17.02   | 78.85         | 15.18  | 1.12        | A         |
| 500.00  | 550.00 | 75.75          | 14.88   | 77.50         | 14.92  | 1.00        | A         |
| 550.00  | 600.00 | 73.05          | 14.35   | 73.78         | 14.21  | 1.01        | A         |
| 600.00  | 650.00 | 67.84          | 13.33   | 72.36         | 13.93  | 0.96        | A         |
| 650.00  | 700.00 | 62.86          | 12.35   | 65.11         | 12.54  | 0.99        | A         |
| 700.00  | 750.00 | 56.68          | 11.14   | 58.21         | 11.21  | 0.99        | A         |
| Sum     |        | 509.01         | 100.00  | 519.35        | 100.00 | 0.98        |           |

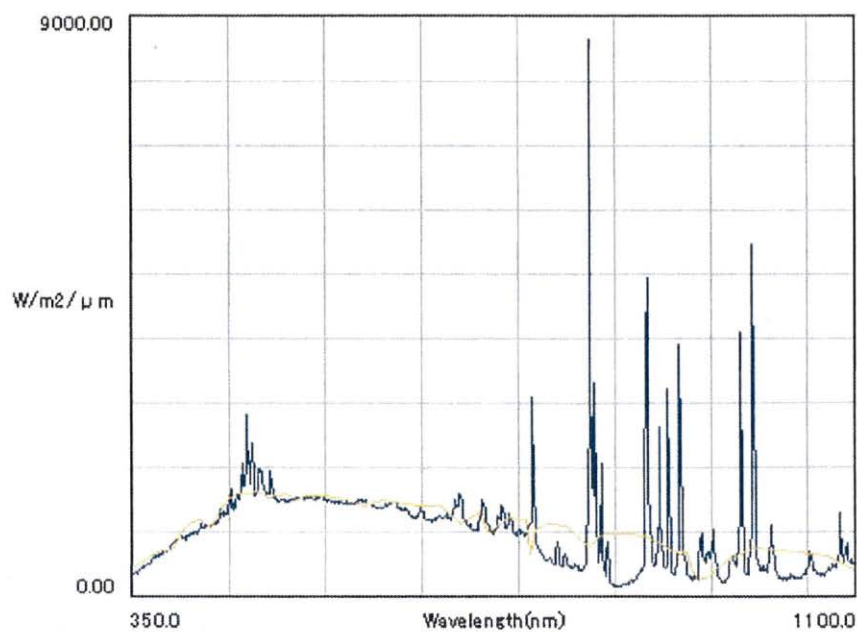

**Figure S9:** Emission spectrum of the light source used for J-V characterizations.
